# Supplementary material for: Induction chemotherapy followed by definitive chemoradiotherapy versus chemoradiotherapy alone in esophageal squamous cell carcinoma: a randomized phase II trial
Source: PubMed Central journal article supplement (PMC8242031; doi:10.1038/s41467-021-24288-1), 2021-06-29

## **Supplementary Material**

**Number of supplementary Tables: 4**

**Number of supplementary Figures: 2**

**Supplementary Table 1.** Compliance to induction chemotherapy

**Supplementary Table 2.** Compliance to concurrent chemoradiotherapy

**Supplementary Table 3.** Death reason according to treatment group

**Supplementary Table 4.** Adverse events during induction chemotherapy

**Supplementary Figure 1.** Compliance to concurrent chemotherapy (A) and actual radiation dose (B).

**Supplementary Figure 2.** Cumulative incidence of recurrences in the two treatment groups.

**Supplementary Table 1. Compliance to induction chemotherapy**

| Variable                                                                   | IC + CRT Group (n = 55) |
|----------------------------------------------------------------------------|-------------------------|
| Patients completing two cycles of IC                                       | 55 (100%)               |
| Patients with dose reductions                                              | 7 (12.7%)               |
| Reasons for dose modification                                              |                         |
| Hematological                                                              | 5 (9.1%)                |
| Non-hematological                                                          | 2 (3.6%)                |
| Patients with the second cycle delay >3 days                               | 10 (18.2%)              |
| Patients with the second cycle delay >7 days                               | 1 (1.8%)                |
| Reason for delay                                                           |                         |
| Adverse events                                                             | 2 (3.6%)                |
| Other*                                                                     | 8 (14.5%)               |
| Median interval between first day of IC to first day of radiotherapy (IQR) | 44 days (42–46)         |

Abbreviations: IC, induction chemotherapy; CRT, chemoradiotherapy; IQR, interquartile range.

\*Other reasons for treatment delays included vacations, logistics, or personal reasons.

**Supplementary Table 2. Compliance to concurrent chemoradiotherapy**

| Variable                                                         | IC + CRT Group (n = 55) | CRT Group (n = 55)  |
|------------------------------------------------------------------|-------------------------|---------------------|
| Patients receiving concurrent chemotherapy                       | 55 (100%)               | 55 (100%)           |
| Patients completing at least two weeks of chemotherapy during RT | 55 (100%)               | 55 (100%)           |
| Patients completing five weeks of chemotherapy during RT         | 36 (65.5%)              | 44 (80.0%)          |
| Patients receiving RT                                            | 55 (100%)               | 55 (100%)           |
| Patients completing RT                                           | 45 (81.8%)              | 50 (90.9%)          |
| Median dose (IQR)                                                | 60 Gy (60–60)           | 60 Gy (60–60)       |
| Median dose per fraction (IQR)                                   | 2.14 Gy (2.0–2.14)      | 2.14 Gy (2.13–2.14) |
| Median duration of RT (IQR)                                      | 38 days (36–41)         | 39 days (37–41)     |
| Reason for premature cessation of RT                             |                         |                     |
| Adverse events                                                   | 7 (12.7%)               | 4 (7.3%)            |
| Patient refusal                                                  | 2 (3.6%)                | 1 (1.8%)            |
| Investigator decision                                            | 1 (1.8%)                | 0 (0%)              |

Abbreviations: IC, induction chemotherapy; CRT, chemoradiotherapy; RT, radiotherapy; IQR, interquartile range.

**Supplementary Table 3. Death reason according to treatment group**

| Variable                | IC + CRT Group (n = 55) | CRT Group (n = 55) |
|-------------------------|-------------------------|--------------------|
| Death                   | 33 (60.0%)              | 35 (63.6%)         |
| Cancer-specific         | 30 (54.5%)              | 30 (54.5%)         |
| Non-cancer specific     | 3 (5.5%)                | 5 (9.1%)           |
| Second primary tumor    | 1 (1.8%)                | 1 (1.8%)           |
| Pneumonia               | 1 (1.8%)                | 2 (3.6%)           |
| Cardiovascular diseases | 1 (1.8%)                | 1 (1.8%)           |
| Unknown                 | 0 (0%)                  | 1 (1.8%)           |

Abbreviations: IC, induction chemotherapy; CRT, chemoradiotherapy.

**Supplementary Table 4. Adverse events during induction chemotherapy**

| Event               | IC + CRT Group (n = 55), % |          |          |         |
|---------------------|----------------------------|----------|----------|---------|
|                     | Grade 1                    | Grade 2  | Grade 3  | Grade 4 |
| Anemia              | 38 (69.1)                  | 2 (3.6)  | 0        | 0       |
| Leukopenia          | 4 (7.3)                    | 7 (12.7) | 6 (10.9) | 2 (3.6) |
| Neutropenia         | 4 (7.3)                    | 1 (1.8)  | 4 (7.3)  | 5 (9.1) |
| Febrile neutropenia | 0                          | 0        | 2 (3.6)  | 0       |
| Thrombocytopenia    | 4 (7.3)                    | 2 (3.6)  | 0        | 0       |
| Hepatotoxic event   | 6 (10.9)                   | 2 (3.6)  | 0        | 0       |
| Nephrotoxic event   | 3 (5.5)                    | 1 (1.8)  | 0        | 0       |
| Nausea/vomiting     | 12 (21.8)                  | 3 (5.5)  | 1 (1.8)  | 0       |
| Diarrhea            | 3 (5.5)                    | 2 (3.6)  | 0        | 0       |
| Weight loss         | 3 (5.5)                    | 0        | 0        | 0       |
| Fatigue             | 4 (7.3)                    | 2 (3.6)  | 0        | 0       |

Abbreviations: IC, induction chemotherapy; CRT, chemoradiotherapy.

**Supplementary Figure 1. Compliance to concurrent chemotherapy (A) and actual radiation dose (B).**

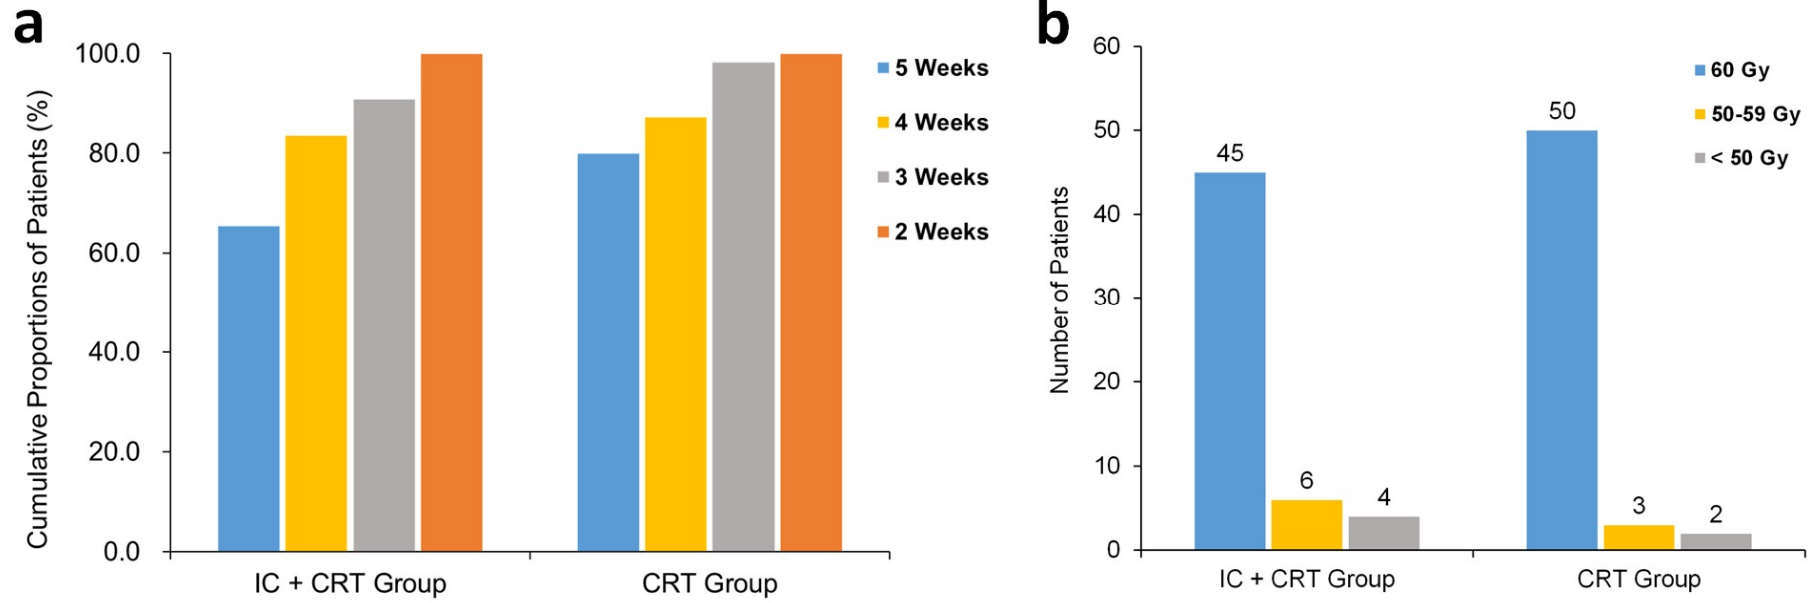

**Supplementary Figure 2. Cumulative incidence of recurrences in the two treatment groups.** A competing risk analysis was used (2-sided).

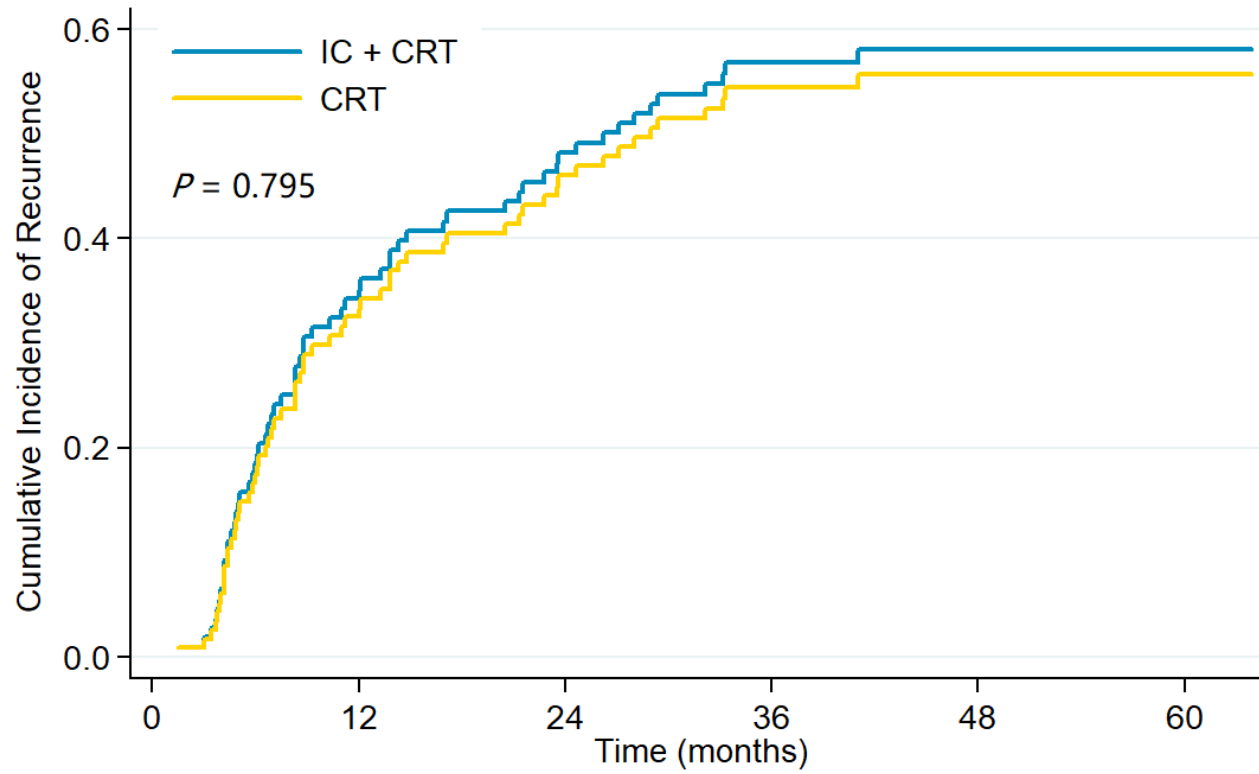

Supplement: 41467_2021_24288_MOESM1_ESM.pdf [file 41467_2021_24288_MOESM1_ESM.pdf]
