# Supplementary material for: Induction chemotherapy followed by definitive chemoradiotherapy versus chemoradiotherapy alone in esophageal squamous cell carcinoma: a randomized phase II trial
Source: PubMed Central journal article supplement (PMC8242031; doi:10.1038/s41467-021-24288-1), 2021-06-29
Supplement: 41467_2021_24288_MOESM3_ESM.pdf [file 41467_2021_24288_MOESM3_ESM.pdf]

## **Description of Additional Supplementary Files**

File Name: Supplementary Data 1

Description: Baseline patient information, survival outcomes, and other therapeutic information.
